# Supplementary material for: Validation of low-density lipoprotein cholesterol equations in pediatric population
Source: PeerJ journal article supplement (doi:10.7717/peerj.14544), 2023-01-05

Concordances of the different equations for LDL-C estimation by triglycerides strata

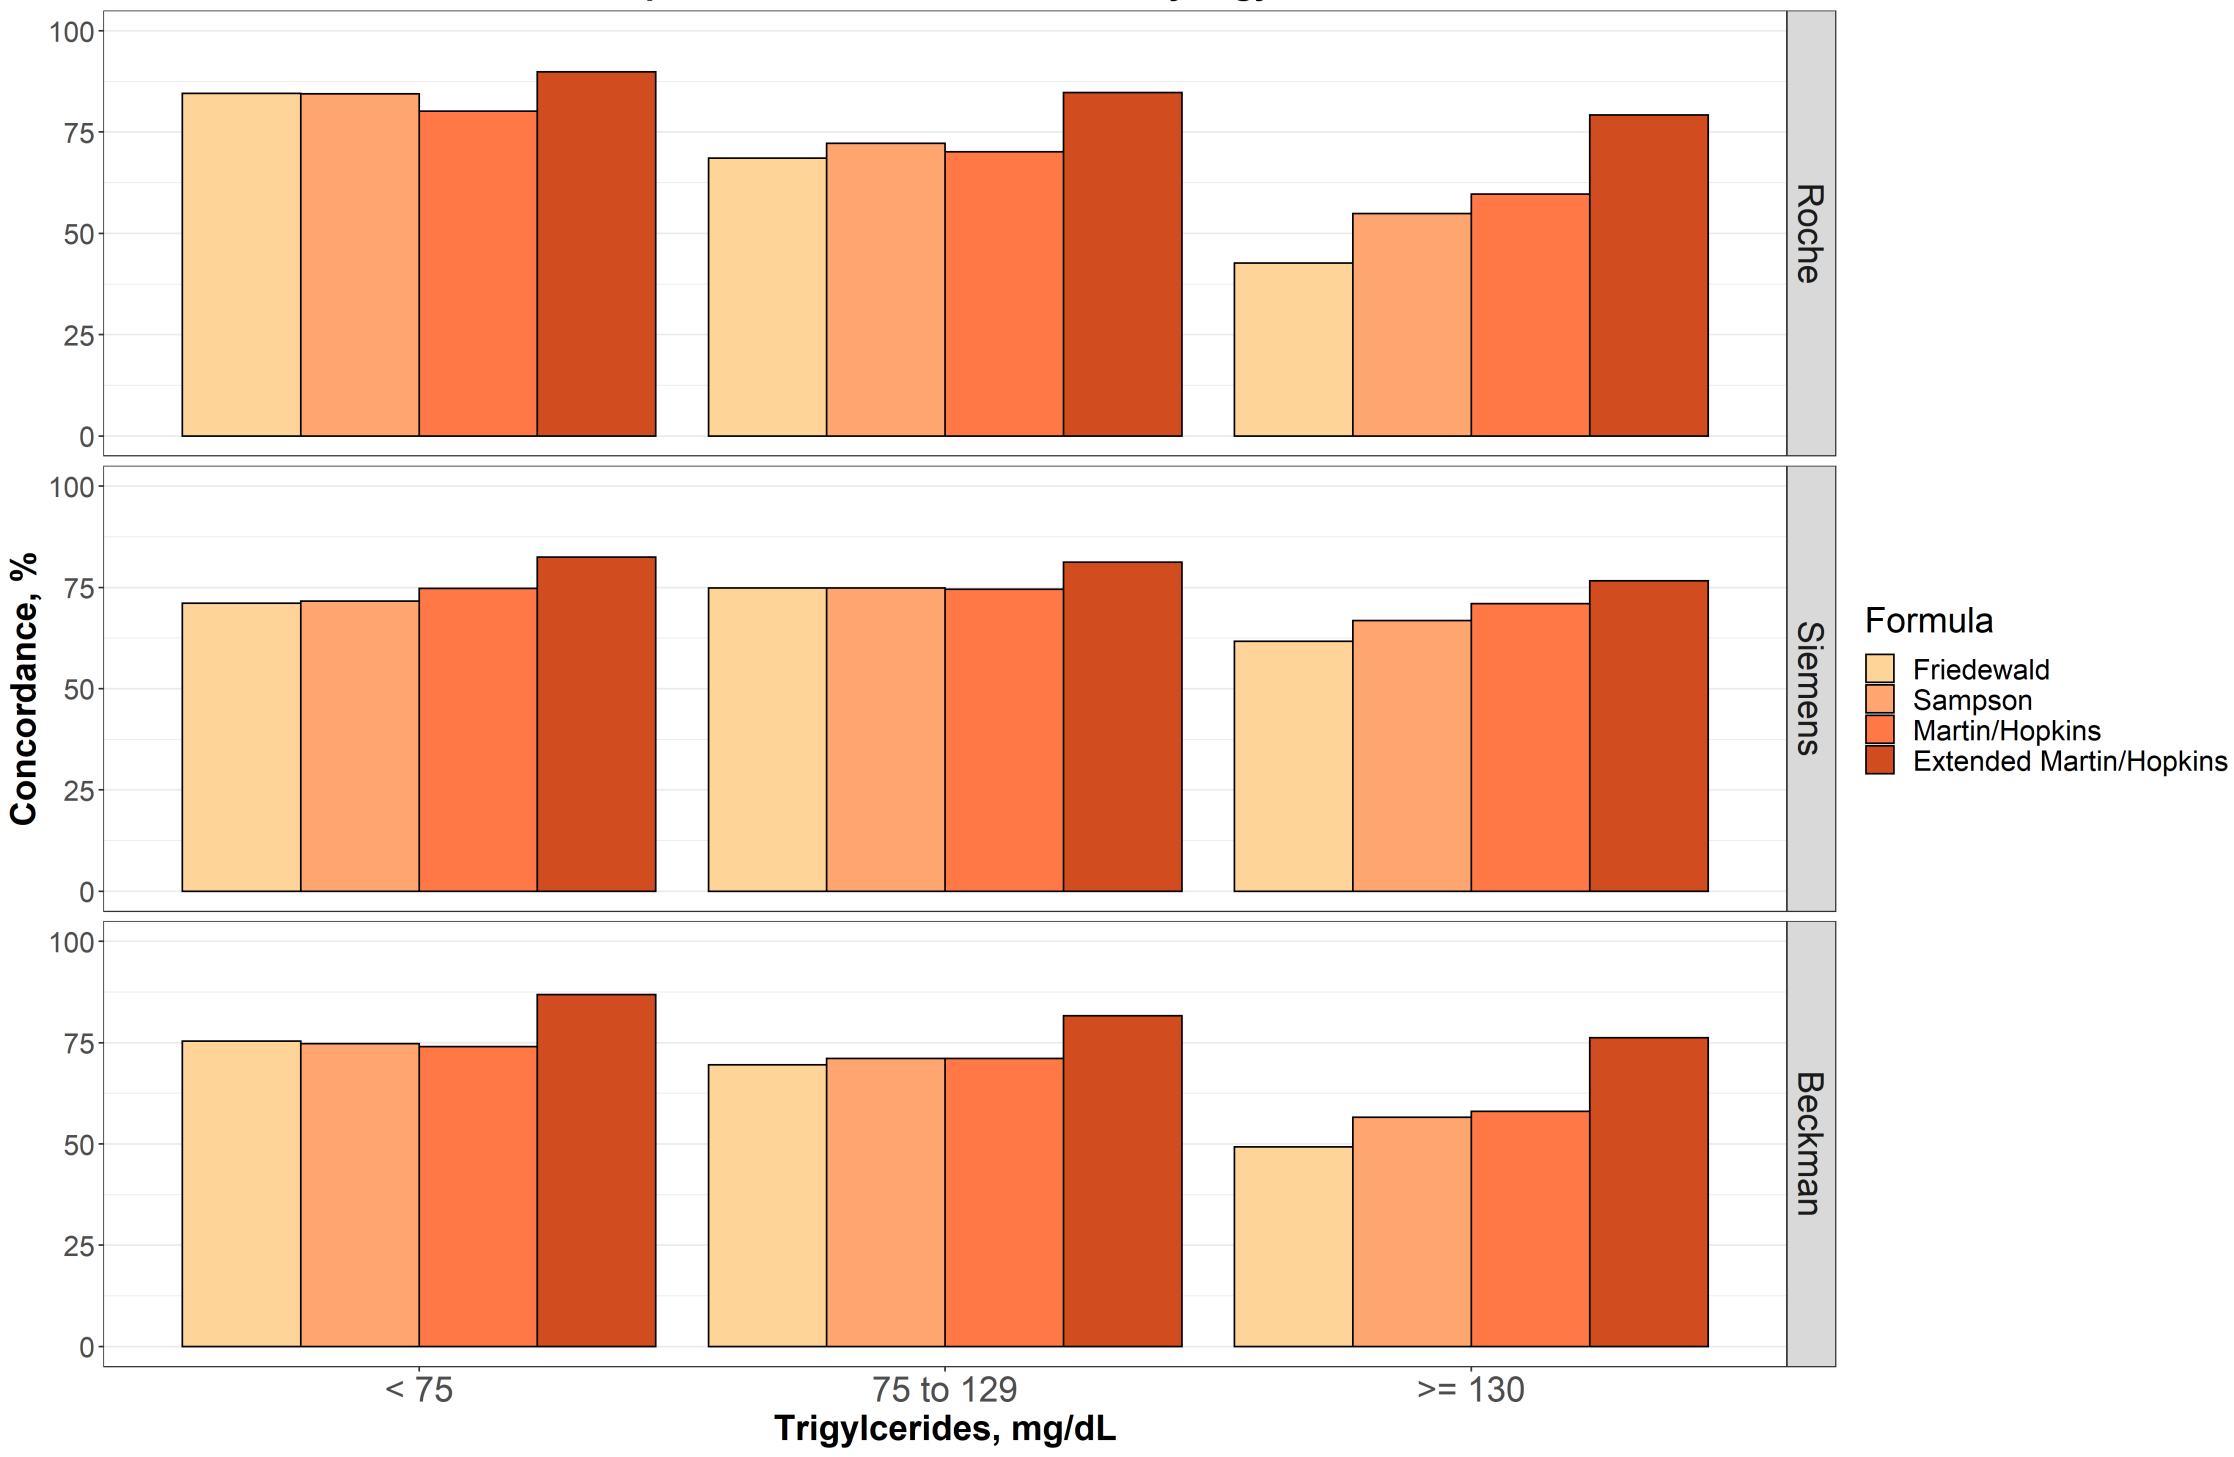

Supplement: SupplementaryFigure1.pdf [file SupplementaryFigure1.pdf]
