# Supplementary material for: Validation of low-density lipoprotein cholesterol equations in pediatric population
Source: PeerJ journal article supplement (doi:10.7717/peerj.14544), 2023-01-05

Concordances of the different equations for LDL-C estimation by triglycerides strata (LDL between 110 to 129 mg/dL)

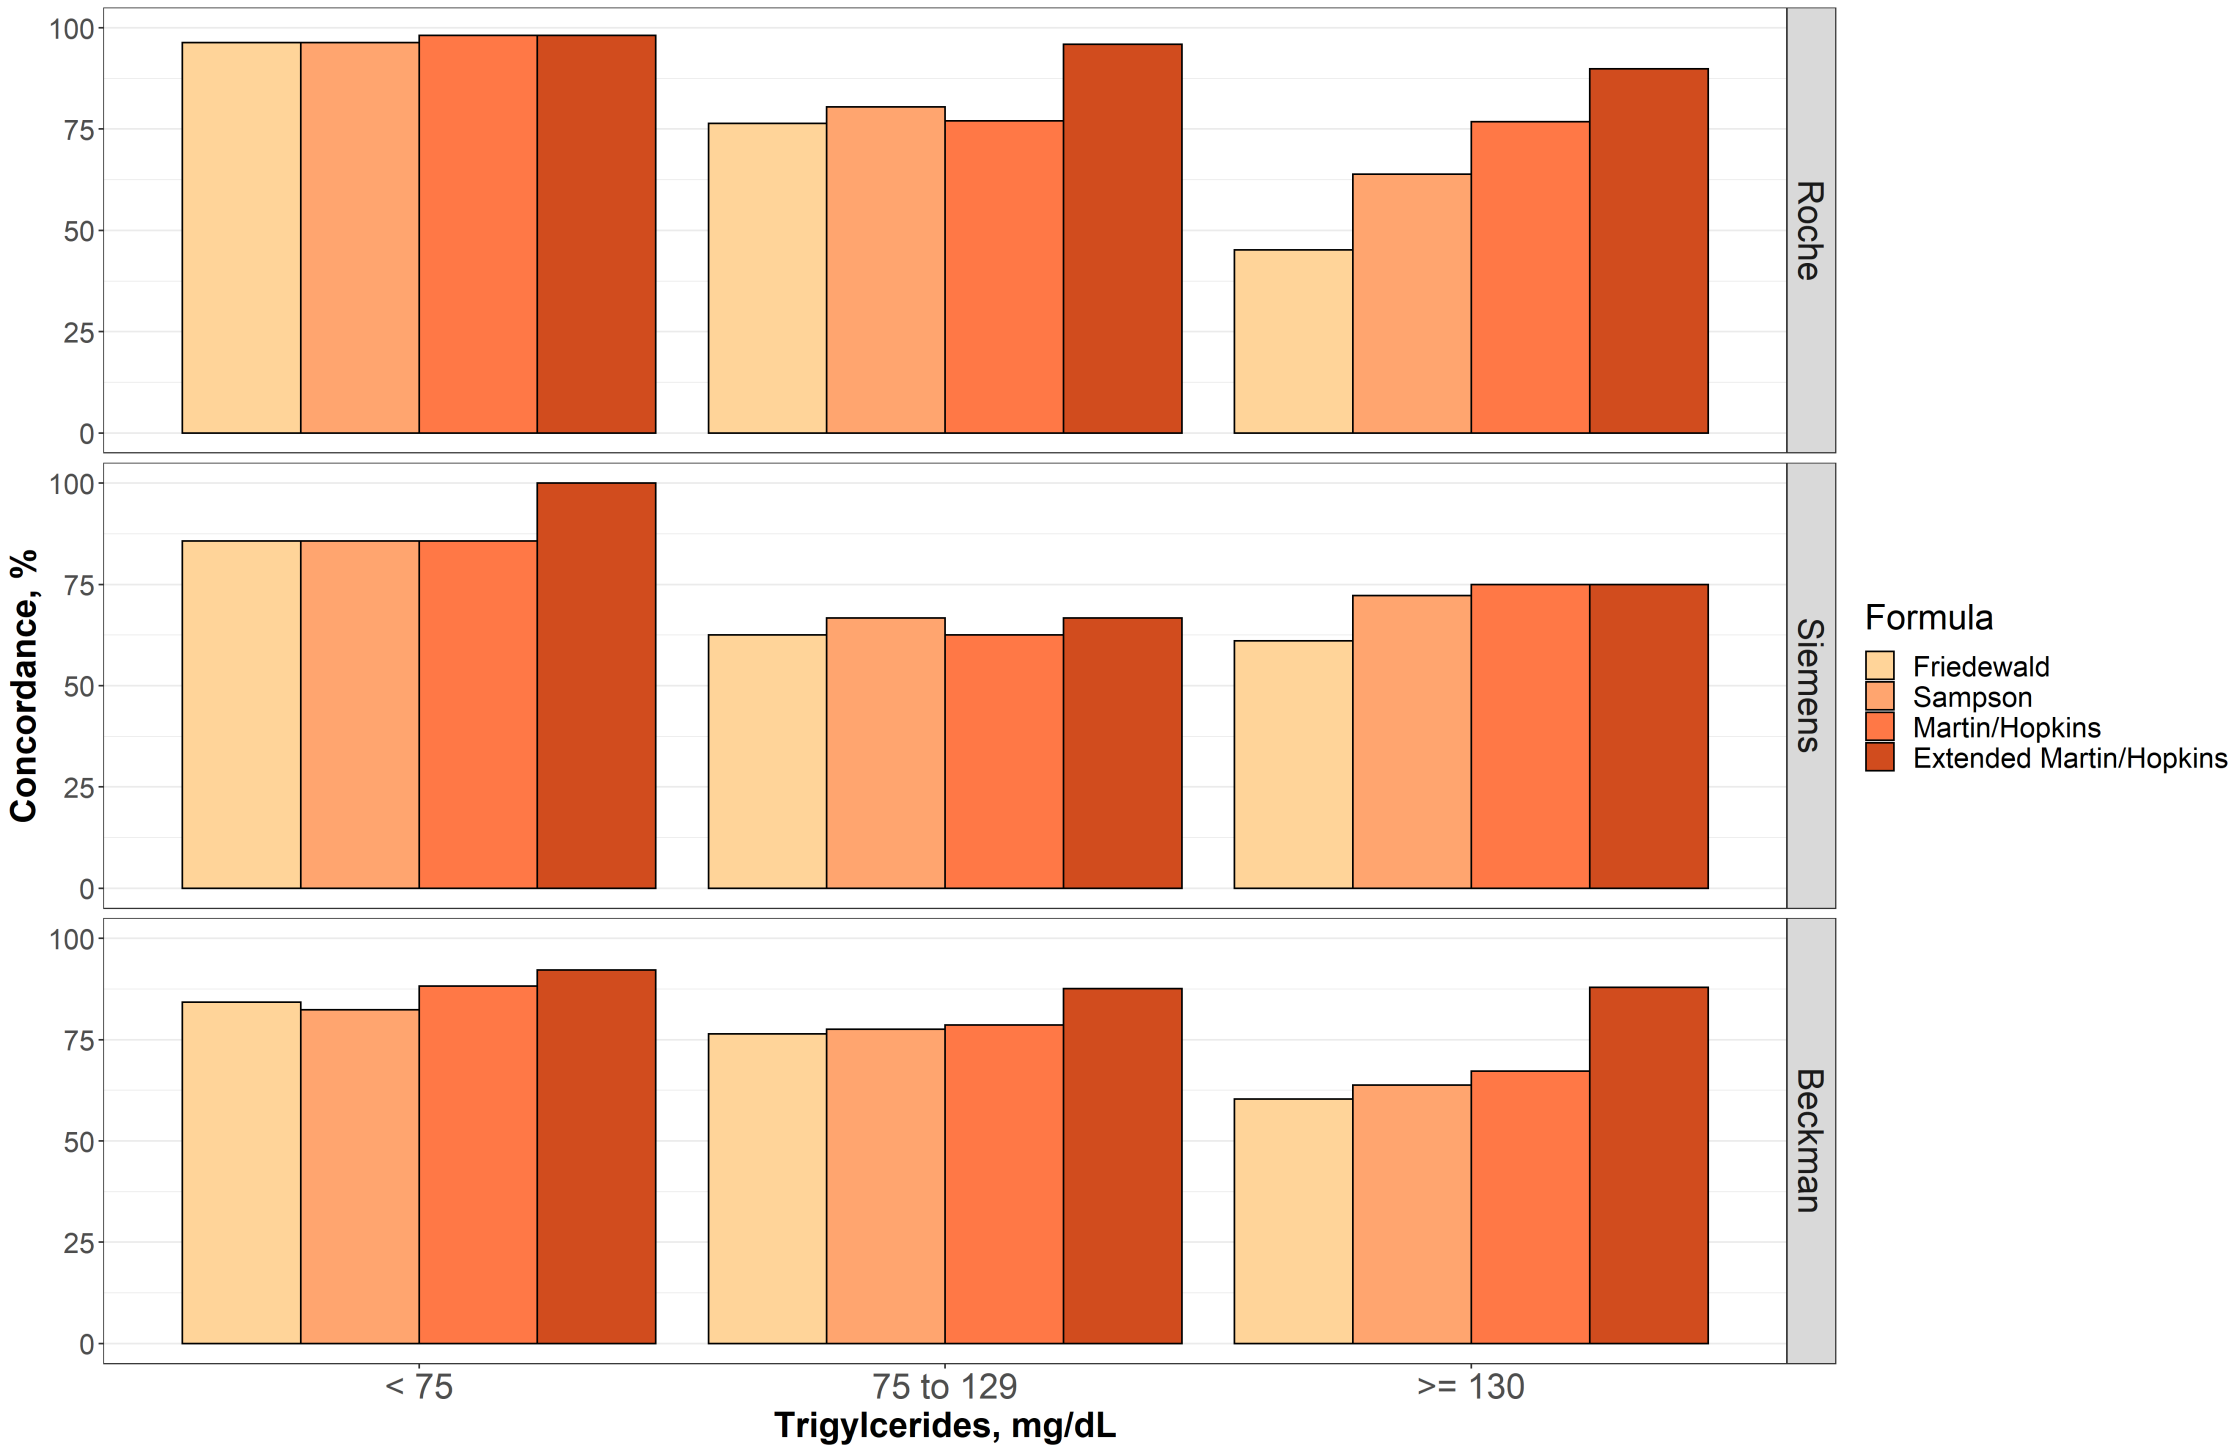

Supplement: SupplementaryFigure3.pdf [file SupplementaryFigure3.pdf]
