# Supplementary material for: Validation of low-density lipoprotein cholesterol equations in pediatric population
Source: PeerJ journal article supplement (doi:10.7717/peerj.14544), 2023-01-05

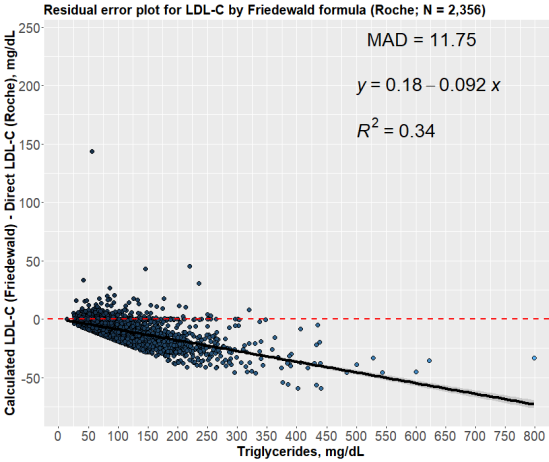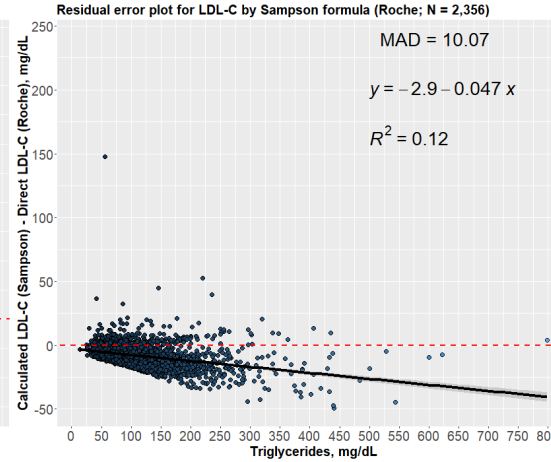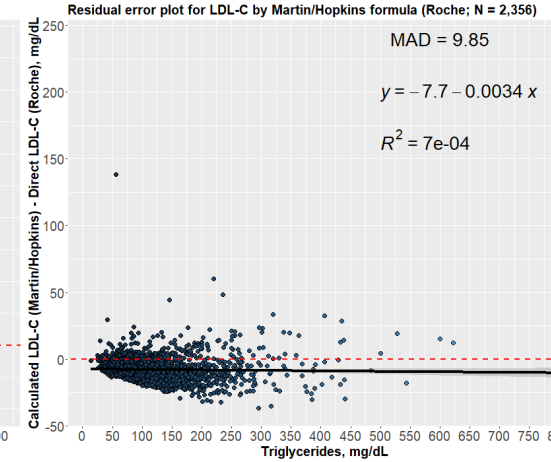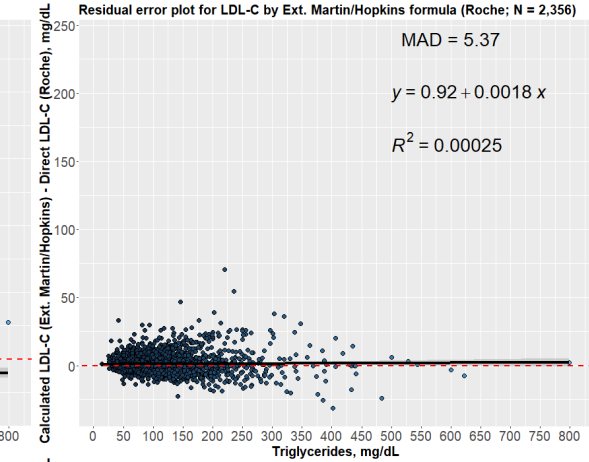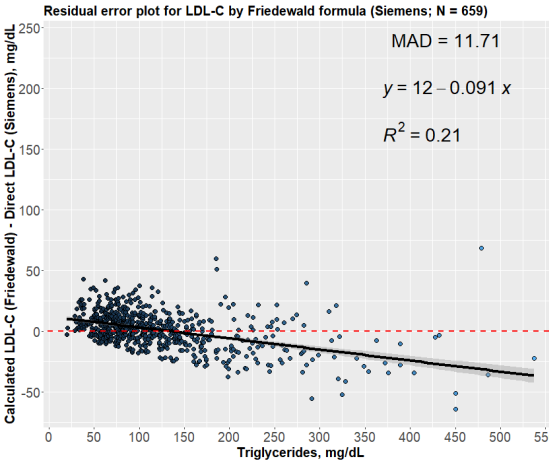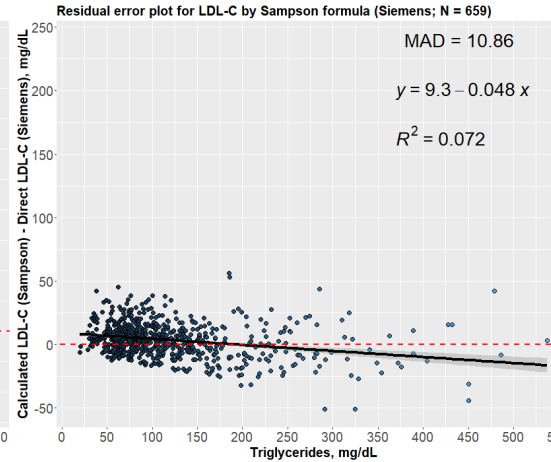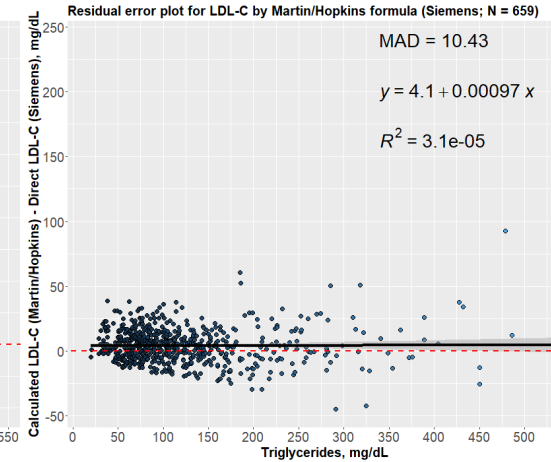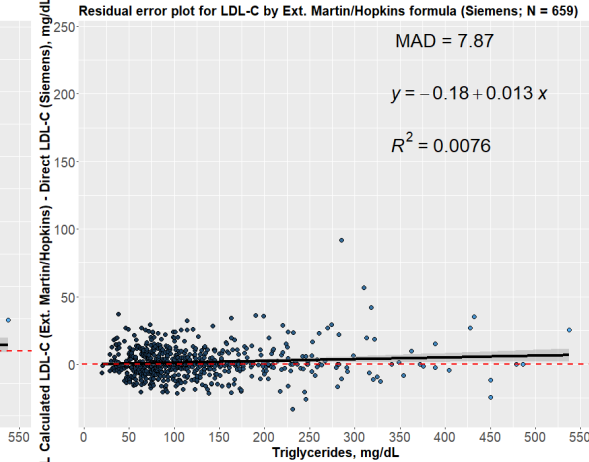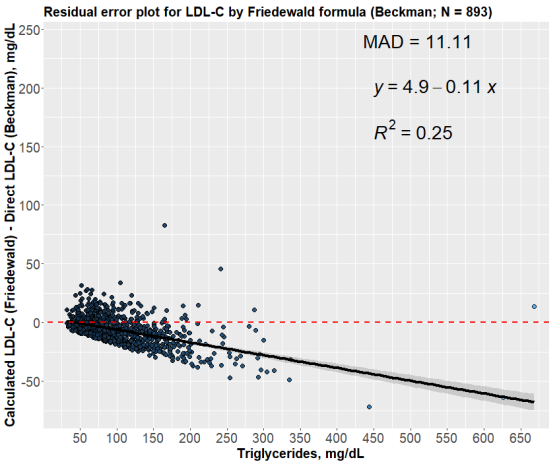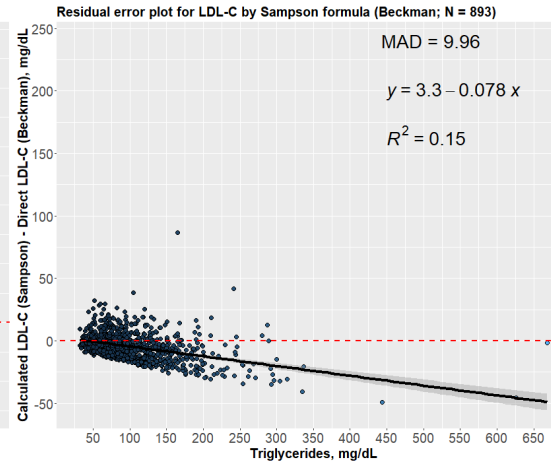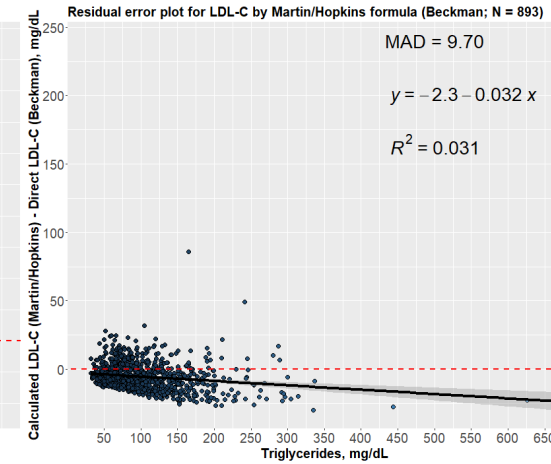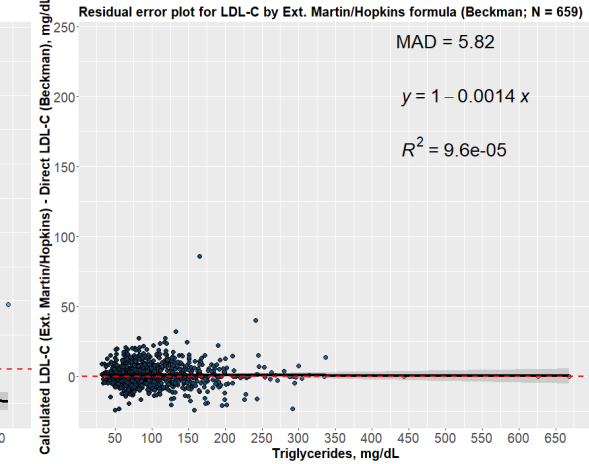

Supplement: SupplementaryFigure9.pdf [file SupplementaryFigure9.pdf]
